# Supplementary material for: Racial and Ethnic Disparities in Hospitalization Outcomes Among Medicare Beneficiaries During the COVID-19 Pandemic
Source: PubMed Central journal article supplement (PMC8796953; doi:10.1001/jamahealthforum.2021.4223), 2021-12-23
Supplement: jamahealthforum-e214223-s001.pdf [file jamahealthforum-e214223-s001.pdf]

## Supplemental Online Content

Song Z, Zhang X, Patterson LJ, et al. Racial and ethnic disparities in hospitalization outcomes among Medicare beneficiaries during the COVID-19 pandemic. *JAMA Health Forum*. Published online December 23, 2021. doi:10.1001/jamahealthforum.2021.4223

**eMethods 1.** Categories of Hospitalizations

**eMethods 2.** Empirical Model Specification

**eFigure 1.** Volume of Hospitalizations by Clinical Category

**eFigure 2.** In-Hospital Mortality by Clinical Category

**eTable 1.** Race/Ethnicity of Covid-19 and Non-COVID-19 Hospitalizations in Medicare

**eTable 2.** Changes in Monthly Hospitalizations by Race/Ethnicity and Clinical Category

**eTable 3.** Changes in Monthly Hospitalizations by Race/Ethnicity and Hospital Location

**eTable 4.** In-Hospital Mortality, Black vs. White and Hispanic vs. White

**eTable 5.** Differential Changes in Hospitalization Outcomes

**eTable 6.** Characteristics of Medicare Hospitalizations by Discharge Status

**eTable 7.** Absent Non-COVID-19 Inpatients During the Pandemic

**eTable 8.** Differential Changes in Risk Score

**eTable 9.** Sensitivity Analyses and Falsification Test

This supplemental material has been provided by the authors to give readers additional information about their work.

## eMethods 1. Categories of Hospitalizations<sup>1</sup>

|                               | <b>ICD-10 Diagnosis Codes</b> | <b>Major Diagnostic Categories (MDCs)</b> | <b>Diagnosis-Related Groups (DRGs)</b> |
|-------------------------------|-------------------------------|-------------------------------------------|----------------------------------------|
| COVID-19 Hospitalizations     | U07.1                         | All                                       | All                                    |
| Non-COVID-19 Hospitalizations | All except U07.1              | All                                       | All                                    |
| Sepsis                        | All except U07.1              | --                                        | 870-872                                |
| Ventilators                   | All except U07.1              | --                                        | 207-208                                |
| Neurologic                    | All except U07.1              | 1                                         | 020-103                                |
| Respiratory                   | All except U07.1              | 4                                         | 163-207                                |
| Cardiac                       | All except U07.1              | 5                                         | 215-316                                |
| Gastrointestinal              | All except U07.1              | 6-7                                       | 326-446                                |
| Orthopedic                    | All except U07.1              | 8                                         | 453-566                                |
| Renal/genitourinary           | All except U07.1              | 11-13                                     | 652-761                                |
| Cancer                        | All except U07.1              | 16-17                                     | 799-849                                |
| Other                         | All except U07.1              | All other                                 | All except 870-872                     |

<sup>1</sup> Major Diagnostic Categories (MDCs) map to diagnosis-related groups (DRGs).

## eMethods 2. Empirical Model Specification

### *Admission-level outcomes:*

For admission-level outcomes (e.g., in-hospital mortality, length of stay), we estimated the following event study model:

$$y_{iht} = \beta_0 + \sum_{t=1/19}^{t=12/20} \beta_t(R_i \times \mathbf{1}(\text{month}_t)) + \Gamma X_i + \theta_h + \delta_t + \varepsilon_{iht}$$

where  $y_{iht}$  is the outcome of interest for admission  $i$  to hospital  $h$  in month  $t$ ;  $R_i$  indicates whether the admission is for a patient of a racial/ethnic minority group and is interacted with a full set of month/year fixed effects;  $X_i$  is vector of admission-level characteristics (age category, sex, race category, disability, and end-stage renal disease [ESRD]);  $\theta_h$  are hospital fixed effects;  $\delta_t$  are month fixed effects; and standard errors are clustered at the hospital level. The coefficients of interest are  $\beta_t$  estimates, which are presented relative to February 2020.

To estimate the average effect in the post-COVID-19 period, we constrain the monthly April 2020-December 2020 coefficients, but allow the effect of race to vary over all other months:

$$y_{iht} = \beta_0 + \sum_{t=1/19}^{t=3/20} \beta_t(R_i \times \mathbf{1}(\text{month}_t)) + \beta_{\text{post}}(R_i \times \text{post}_t) + \Gamma X_i + \theta_h + \delta_t + \varepsilon_{iht}$$

### *Hospital-level outcomes:*

For hospital-level outcomes (e.g., volume of hospitalizations, Medicare spending), we used similar model specifications:

April specific effect:

$$y_{jht} = \beta_0 + \sum_{t=1/19}^{t=9/20} \beta_t(R_j \times \mathbf{1}(\text{month}_t)) + \Gamma X_j + \theta_h + \delta_t + \varepsilon_{jht}$$

where  $y_{jht}$  is the outcome of interest for race category  $j$  to hospital  $h$  in month  $t$ ;  $R_j$  indicates whether the race category is a racial/ethnic minority group; and  $X_j$  is a vector of time-vary characteristics (share of admissions female, share of admissions in each age category, share of admissions with a disability, share of admissions with ESRD).

April-September average month effect:

$$y_{jht} = \beta_0 + \sum_{t=1/19}^{t=3/20} \beta_t(R_j \times \mathbf{1}(\text{month}_t)) + \beta_{\text{post}}(R_j \times \text{post}_t) + \Gamma X_j + \theta_h + \delta_t + \varepsilon_{jht}$$

**eFigure 1. Hospitalization Rate by Clinical Category**

The COVID and non-COVID hospitalization rate (per 1,000 Medicare beneficiaries) for White patients (gray diamonds), Black patients (green circles), Hispanic patients (purple circles), and patients of remaining racial and ethnic minority groups (orange circles). Remaining racial and ethnic minority group members included Asian, North American Native, and beneficiaries of “unknown” or “other” race as reported by the Medicare beneficiary race variable from the Social Security Administration. COVID hospitalizations comprise patients who had a diagnosis of COVID-19 during the hospitalization, whether or not COVID-19 was the chief reason for hospitalization. The vertical line denotes February 2020, the last pre-pandemic month.

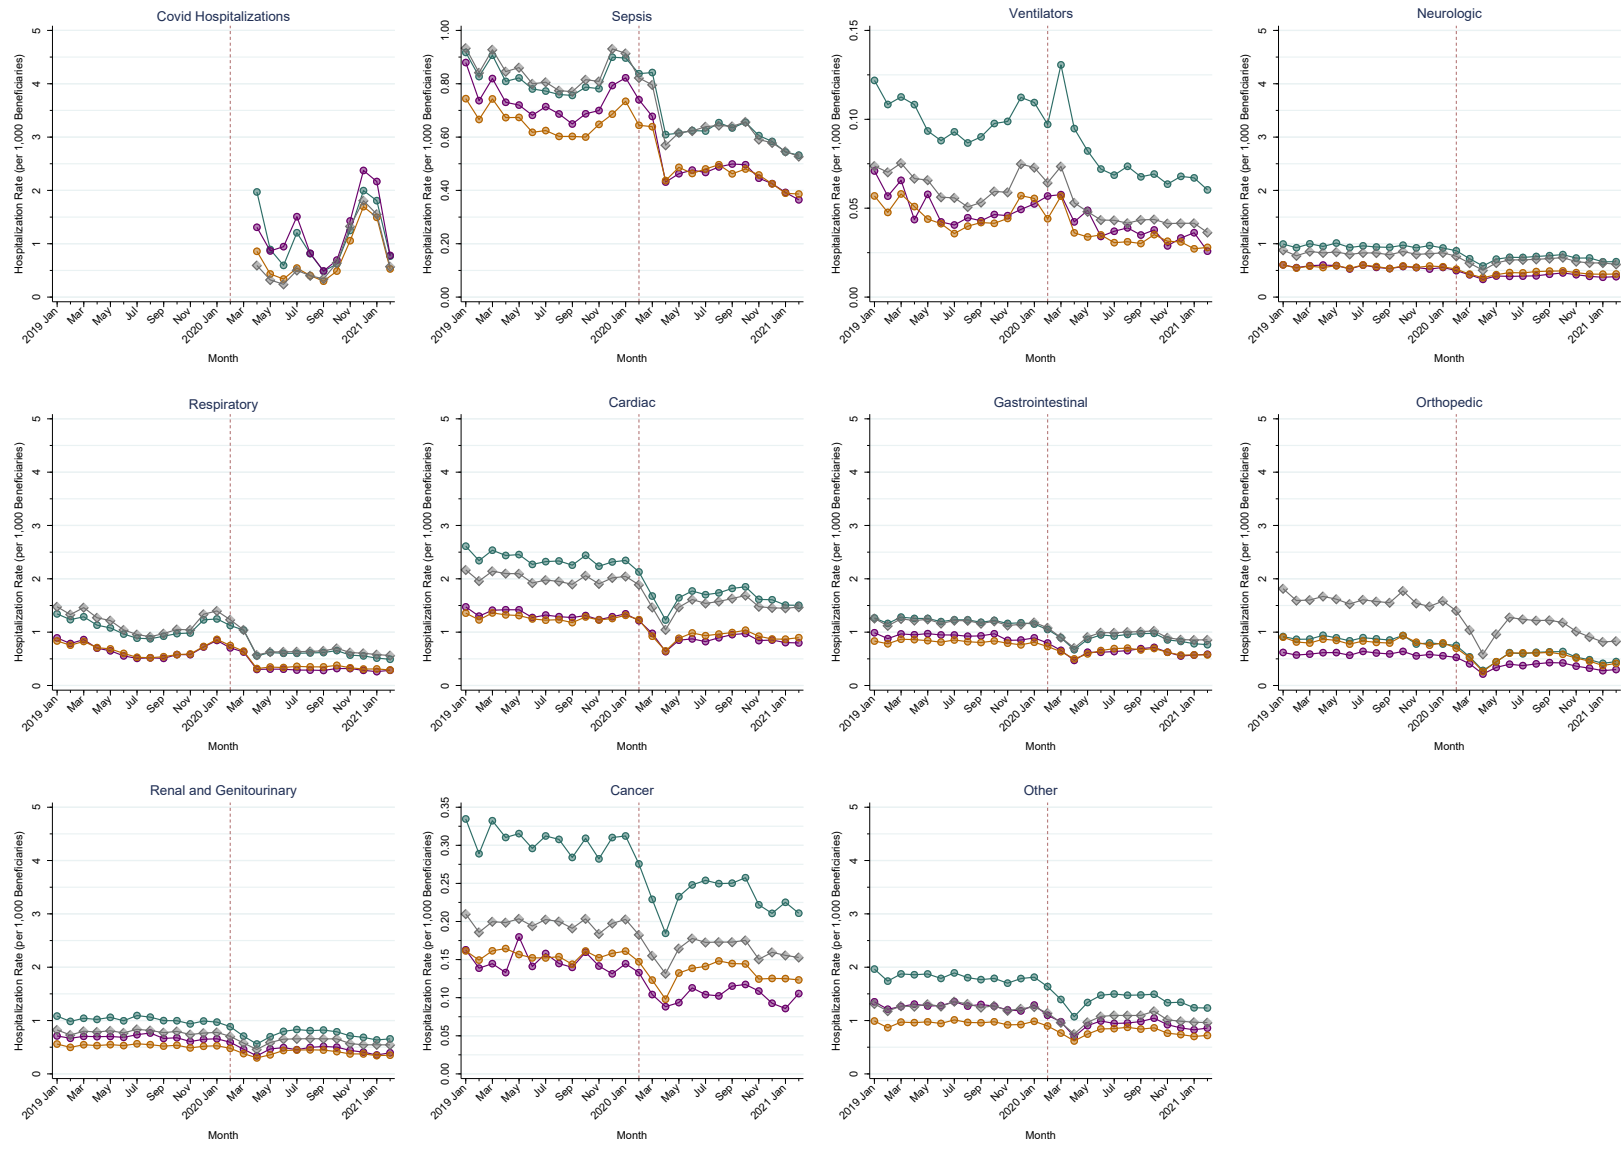

**eFigure 2. In-hospital Mortality by Clinical Category**

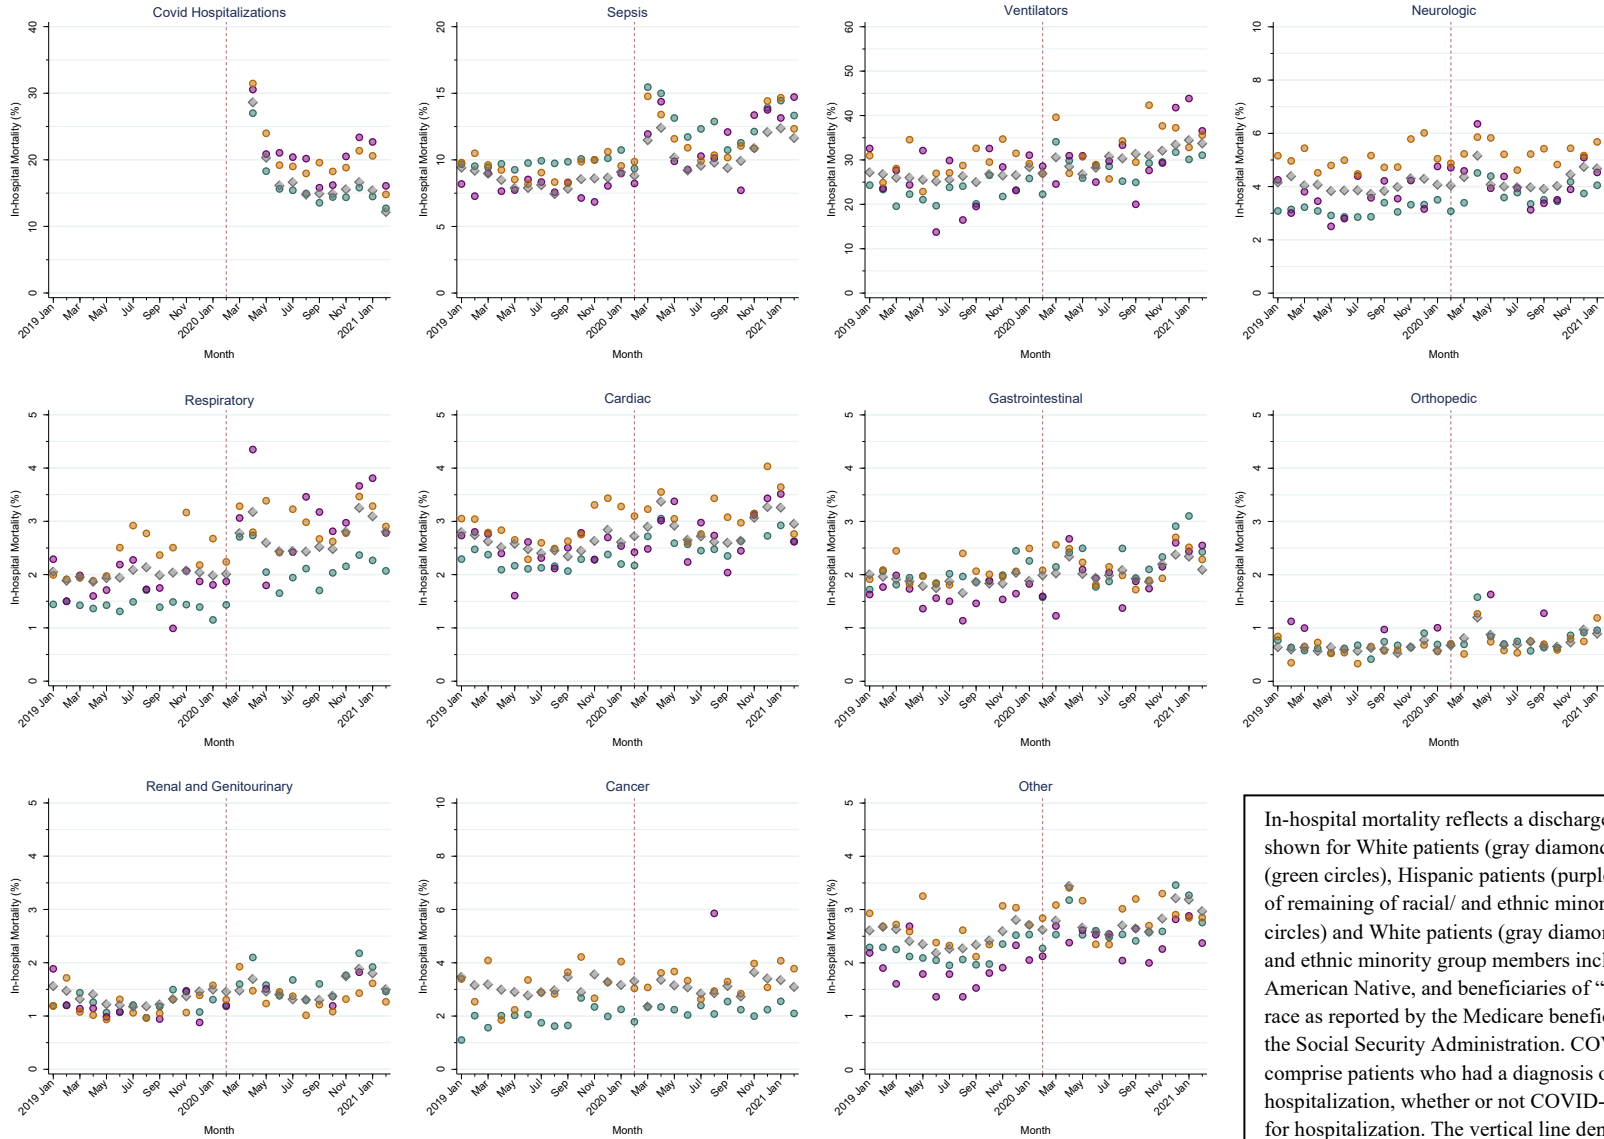

In-hospital mortality reflects a discharge status of death and is shown for White patients (gray diamonds), Black patients (green circles), Hispanic patients (purple circles), and patients of remaining racial/ and ethnic minority groups (green orange circles) and White patients (gray diamonds). Remaining racial and ethnic minority group members included Asian, North American Native, and beneficiaries of “unknown” or “other” race as reported by the Medicare beneficiary race variable from the Social Security Administration. COVID hospitalizations comprise patients who had a diagnosis of COVID-19 during the hospitalization, whether or not COVID-19 was the chief reason for hospitalization. The vertical line denotes February 2020, the last pre-pandemic month. Mortality rates for cells containing 10 or fewer deaths were suppressed to protect confidentiality.

**eTable 1. Race and Ethnic Composition of COVID-19 and Non-COVID-19 Hospitalizations in Medicare<sup>1</sup>**

|                                                              | Non-COVID-19 Patients |              | COVID-19 Patients |
|--------------------------------------------------------------|-----------------------|--------------|-------------------|
|                                                              | Pre-COVID             | During COVID | During COVID      |
| Monthly hospitalizations                                     | 590,366               | 429,697      | 50,570            |
| White (%)                                                    | 81.2                  | 81.5         | 73.3              |
| Black (%)                                                    | 11.7                  | 11.5         | 15.1              |
| Hispanic (%)                                                 | 2.2                   | 2.1          | 4.8               |
| Remaining racial and ethnic minority groups (%) <sup>2</sup> | 4.8                   | 4.9          | 6.8               |

<sup>1</sup> Data are from the Centers for Medicare and Medicaid Services 100% inpatient claims files, which capture all Medicare fee-for-service hospitalizations. Pre-Covid denotes January 2019 through February 2020; during Covid denotes April 2020 through February 2021.

<sup>2</sup> Remaining racial and ethnic minority group members included Asian, North American Native, and beneficiaries of “unknown” or “other” race as reported by the Medicare beneficiary race variable from the Social Security Administration.

**eTable 2. Changes in Monthly Hospitalizations by Racial and Ethnic Group and Clinical Category<sup>1</sup>**

|                                      | White     |              |          | Black     |              |          | Hispanic  |              |          | Remaining Racial and Ethnic Minority Groups <sup>2</sup> |              |          |
|--------------------------------------|-----------|--------------|----------|-----------|--------------|----------|-----------|--------------|----------|----------------------------------------------------------|--------------|----------|
|                                      | Pre-COVID | During COVID | % Change | Pre-COVID | During COVID | % Change | Pre-COVID | During COVID | % Change | Pre-COVID                                                | During COVID | % Change |
| <b>COVID-19 Hospitalizations</b>     | --        | 37.1         | --       | --        | 7.6          | --       | --        | 2.4          | --       | --                                                       | 3.4          | --       |
| <b>Non-COVID-19 Hospitalizations</b> | 479.6     | 350.2        | -27.0    | 69.4      | 49.4         | -28.7    | 13.2      | 8.9          | -32.8    | 28.2                                                     | 21.2         | -24.8    |
| Sepsis                               | 40.8      | 29.6         | -27.5    | 5.4       | 4.1          | -24.8    | 1.4       | 0.9          | -36.0    | 2.9                                                      | 2.1          | -27.5    |
| Ventilators                          | 3.1       | 2.1          | -31.2    | 0.7       | 0.5          | -27.8    | 0.1       | 0.1          | -25.6    | 0.2                                                      | 0.1          | -28.3    |
| Neurologic                           | 39.6      | 32.5         | -18.1    | 6.3       | 4.9          | -22.6    | 1.1       | 0.8          | -25.8    | 2.5                                                      | 2.1          | -16.4    |
| Respiratory                          | 57.5      | 30.4         | -47.1    | 7.2       | 3.9          | -45.6    | 1.3       | 0.6          | -53.9    | 3.0                                                      | 1.5          | -47.7    |
| Cardiac                              | 96.9      | 73.2         | -24.4    | 15.6      | 11.0         | -29.1    | 2.5       | 1.7          | -32.9    | 5.5                                                      | 4.2          | -23.9    |
| Gastrointestinal                     | 57.1      | 45.1         | -21.1    | 7.9       | 5.9          | -26.2    | 1.7       | 1.2          | -29.7    | 3.5                                                      | 2.9          | -18.9    |
| Orthopedic                           | 76.9      | 50.2         | -34.7    | 5.7       | 3.5          | -38.1    | 1.1       | 0.7          | -37.7    | 3.5                                                      | 2.3          | -35.0    |
| Renal/genitourinary                  | 37.6      | 29.2         | -22.5    | 6.7       | 4.9          | -26.3    | 1.3       | 0.9          | -31.6    | 2.3                                                      | 1.8          | -21.3    |
| Cancer                               | 9.5       | 8.0          | -16.0    | 2.0       | 1.6          | -22.4    | 0.3       | 0.2          | -26.5    | 0.7                                                      | 0.6          | -10.2    |
| Other                                | 60.6      | 49.9         | -17.6    | 11.9      | 9.2          | -22.9    | 2.4       | 1.8          | -24.2    | 4.1                                                      | 3.6          | -13.4    |
| <b>All Hospitalizations</b>          | 479.6     | 387.2        | -19.3    | 69.4      | 57.1         | -17.8    | 13.2      | 11.3         | -14.3    | 28.2                                                     | 24.6         | -12.7    |

<sup>1</sup> Monthly hospitalizations are shown in 1,000s. Pre-COVID denotes January 2019 through February 2020; during COVID denotes April 2020 through February 2021. Percent (%) change is calculated relative to the pre-COVID baseline.

<sup>2</sup> Remaining racial and ethnic minority group members included Asian, North American Native, and beneficiaries of “unknown” or “other” race as reported by the Medicare beneficiary race variable from the Social Security Administration.

**eTable 3. Changes in Monthly Hospitalizations by Racial and Ethnic Group and Hospital Location<sup>1</sup>**

|                                      | White     |              |          | Black     |              |          | Hispanic  |              |          | Remaining Racial and Ethnic Minority Groups <sup>2</sup> |              |          |
|--------------------------------------|-----------|--------------|----------|-----------|--------------|----------|-----------|--------------|----------|----------------------------------------------------------|--------------|----------|
|                                      | Pre-COVID | During COVID | % Change | Pre-COVID | During COVID | % Change | Pre-COVID | During COVID | % Change | Pre-COVID                                                | During COVID | % Change |
| <b>COVID-19 Hospitalizations</b>     | --        | 37.08        | --       | --        | 7.62         | --       | --        | 2.44         | --       | --                                                       | 3.43         | --       |
| Urban hospitals                      | --        | 32.16        | --       | --        | 6.90         | --       | --        | 2.35         | --       | --                                                       | 3.15         | --       |
| Rural hospitals                      | --        | 4.92         | --       | --        | 0.72         | --       | --        | 0.09         | --       | --                                                       | 0.29         | --       |
| <b>Non-COVID-19 Hospitalizations</b> | 479.56    | 350.16       | -27.0    | 69.36     | 49.43        | -28.7    | 13.23     | 8.90         | -32.8    | 28.21                                                    | 21.21        | -24.8    |
| Urban hospitals                      | 428.88    | 314.65       | -26.6    | 64.55     | 46.19        | -28.5    | 12.87     | 8.65         | -32.7    | 26.35                                                    | 19.84        | -24.7    |
| Rural hospitals                      | 50.68     | 35.51        | -29.9    | 4.81      | 3.25         | -32.6    | 0.37      | 0.24         | -33.8    | 1.85                                                     | 1.37         | -26.3    |
| <b>All Hospitalizations</b>          | 479.56    | 387.24       | -19.3    | 69.37     | 57.05        | -17.8    | 13.23     | 11.34        | -14.3    | 28.21                                                    | 24.64        | -12.7    |
| Urban hospitals                      | 428.89    | 346.82       | -19.1    | 64.55     | 53.09        | -17.8    | 12.87     | 11.00        | -14.5    | 26.35                                                    | 22.99        | -12.8    |
| Rural hospitals                      | 50.68     | 40.43        | -20.2    | 4.81      | 3.96         | -17.7    | 0.37      | 0.33         | -9.2     | 1.85                                                     | 1.65         | -11.0    |

<sup>1</sup> Monthly hospitalizations are shown in 1,000s. Pre-COVID denotes January 2019 through February 2020; during COVID denotes April 2020 through February 2021. Percent (%) change is calculated relative to the pre-COVID baseline.

<sup>2</sup> Remaining racial and ethnic minority group members included Asian, North American Native, and beneficiaries of “unknown” or “other” race as reported by the Medicare beneficiary race variable from the Social Security Administration.



**eTable 4. In-Hospital Mortality, Black vs. White and Hispanic vs. White, Remaining Racial and Ethnic Minority Groups vs. White<sup>1</sup>**

|                                                                          | White     |              | Racial and Ethnic Minority Group |              | Between-group Difference <sup>2</sup> |          |                |            |
|--------------------------------------------------------------------------|-----------|--------------|----------------------------------|--------------|---------------------------------------|----------|----------------|------------|
|                                                                          | Pre-COVID | During COVID | Pre-COVID                        | During COVID | Un-adjusted                           | Adjusted | 95% CI         | Change (%) |
| <b>Black vs. White</b>                                                   |           |              |                                  |              |                                       |          |                |            |
| COVID-19 Hospitalizations                                                | --        | 16.63        | --                               | 16.97        | 0.34                                  | 0.11     | -0.24 to 0.47  | --         |
| Discharges to hospice included in mortality <sup>3</sup>                 | --        | 22.41        | --                               | 20.73        | -1.68                                 | -1.08    | -1.48 to -0.69 | --         |
| Death during 30-day readmissions included in mortality <sup>4</sup>      | --        | 19.03        | --                               | 19.26        | 0.23                                  | 0.33     | -0.04 to 0.70  | --         |
| All-cause death within 30-days (a) <sup>5</sup>                          | --        | 27.79        | --                               | 25.58        | -2.22                                 | -0.89    | -1.30 to -0.47 | --         |
| All-cause death within 30-days (b) <sup>5</sup>                          | --        | 27.82        | --                               | 25.62        | -2.20                                 | -0.89    | -1.30 to -0.48 | --         |
| Admitted from skilled nursing facilities                                 | --        | 7.42         | --                               | 8.25         | 0.83                                  | 0.43     | 0.11 to 0.75   | --         |
| Non-COVID-19 Hospitalizations                                            | 2.80      | 3.30         | 2.75                             | 3.55         | 0.30                                  | 0.48     | 0.33 to 0.63   | 17.5       |
| Discharges to hospice included in mortality                              | 5.99      | 7.22         | 5.29                             | 6.79         | 0.26                                  | 0.53     | 0.32 to 0.73   | 10.0       |
| Death during 30-day readmissions included in mortality                   | 3.55      | 4.24         | 3.61                             | 4.73         | 0.43                                  | 0.56     | 0.39 to 0.73   | 15.5       |
| All-cause death within 30-days (a)                                       | 8.15      | 9.72         | 7.11                             | 9.05         | 0.37                                  | 0.56     | 0.31 to 0.80   | 7.9        |
| All-cause death within 30-days (b)                                       | 8.30      | 9.89         | 7.25                             | 9.21         | 0.37                                  | 0.59     | 0.34 to 0.84   | 8.1        |
| <b>Hispanic vs. White</b>                                                |           |              |                                  |              |                                       |          |                |            |
| COVID-19 Hospitalizations                                                | --        | 16.63        | --                               | 21.72        | 5.09                                  | 3.49     | 2.90 to 4.08   | --         |
| Discharges to hospice included in mortality                              | --        | 22.41        | --                               | 25.42        | 3.01                                  | 2.89     | 2.25 to 3.52   | --         |
| Death during 30-day readmissions included in mortality <sup>3</sup>      | --        | 19.03        | --                               | 24.43        | 5.40                                  | 3.82     | 3.21 to 4.44   | --         |
| All-cause death within 30-days (a)                                       | --        | 27.79        | --                               | 29.70        | 1.91                                  | 2.34     | 1.68 to 2.99   | --         |
| All-cause death within 30-days (b)                                       | --        | 27.82        | --                               | 29.73        | 1.91                                  | 2.34     | 1.68 to 2.99   | --         |
| Admitted from skilled nursing facilities                                 | --        | 7.42         | --                               | 3.86         | -3.56                                 | -3.74    | -4.21 to -3.27 | --         |
| Non-COVID-19 Hospitalizations                                            | 2.80      | 3.30         | 2.77                             | 3.58         | 0.30                                  | 0.29     | -0.04 to 0.62  | 10.6       |
| Discharges to hospice included in mortality                              | 5.99      | 7.22         | 5.31                             | 6.82         | 0.27                                  | 0.49     | 0.05 to 0.92   | 9.2        |
| Death during 30-day readmissions included in mortality <sup>3</sup>      | 3.55      | 4.24         | 3.55                             | 4.71         | 0.47                                  | 0.47     | 0.10 to 0.83   | 13.1       |
| All-cause death within 30-days (a)                                       | 8.15      | 9.72         | 6.78                             | 8.84         | 0.48                                  | 0.65     | 0.16 to 1.15   | 9.6        |
| All-cause death within 30-days (b)                                       | 8.30      | 9.89         | 6.90                             | 8.98         | 0.48                                  | 0.68     | 0.18 to 1.18   | 9.9        |
| <b>Remaining Racial and Ethnic Minority Groups vs. White<sup>6</sup></b> |           |              |                                  |              |                                       |          |                |            |
| COVID-19 Hospitalizations                                                | --        | 16.63        | --                               | 20.97        | 4.34                                  | 3.50     | 2.95 to 4.06   | --         |
| Discharges to hospice included in mortality                              | --        | 22.41        | --                               | 24.27        | 1.86                                  | 2.47     | 1.90 to 3.04   | --         |
| Death during 30-day readmissions included in mortality <sup>3</sup>      | --        | 19.03        | --                               | 23.97        | 4.94                                  | 3.95     | 3.37 to 4.53   | --         |
| All-cause death within 30-days (a)                                       | --        | 27.79        | --                               | 29.47        | 1.68                                  | 2.86     | 2.25 to 3.47   | --         |
| All-cause death within 30-days (b)                                       | --        | 27.82        | --                               | 29.51        | 1.69                                  | 2.86     | 2.26 to 3.47   | --         |
| Admitted from skilled nursing facilities                                 | --        | 7.42         | --                               | 6.15         | -1.28                                 | -2.31    | -2.70 to -1.91 | --         |
| Non-COVID-19 Hospitalizations                                            | 2.80      | 3.30         | 3.32                             | 3.79         | -0.03                                 | 0.07     | -0.17 to 0.30  | 2.4        |
| Discharges to hospice included in mortality                              | 5.99      | 7.22         | 5.79                             | 7.01         | -0.02                                 | 0.21     | -0.11 to 0.54  | 3.5        |
| Death during 30-day readmissions included in mortality <sup>3</sup>      | 3.55      | 4.24         | 4.23                             | 4.92         | 0.01                                  | 0.03     | -0.24 to 0.31  | 1.0        |
| All-cause death within 30-days (a)                                       | 8.15      | 9.72         | 7.69                             | 9.34         | 0.08                                  | 0.24     | -0.13 to 0.62  | 3.0        |
| All-cause death within 30-days (b)                                       | 8.30      | 9.89         | 7.87                             | 9.54         | 0.09                                  | 0.29     | -0.09 to 0.67  | 3.5        |

<sup>1</sup> Pre-COVID denotes January 2019 through February 2020; during COVID denotes April 2020 through February 2021.

<sup>2</sup> Between-group differences were cross-sectional differences for COVID-19 hospitalizations. For non-COVID-19 hospitalizations, between-group differences were differences in the changes between the racial/ethnic minority groups and White groups. Adjusted between-group differences were estimates from the statistical model, adjusted for age, sex, disability, end-stage renal disease (ESRD), month fixed effects, and hospital fixed effects, with standard errors clustered at the hospital level.

<sup>3</sup> In-hospital mortality reflects a discharge status of death. Among COVID-19 hospitalizations, a sensitivity analysis included discharges to hospice in the definition of in-hospital mortality.

<sup>4</sup> A sensitivity analysis included in-hospital deaths during 30-day readmissions to the index hospitalizations in the definition of mortality. Any hospitalization within 30 days of the index discharge date was considered a readmission, unless the subsequent hospitalization had a diagnosis of COVID-19 or any of the DRGs included on CMS's Bundled Payments for Care Improvement (BPCI) advanced MS-DRG exclusions list.

<sup>5</sup> A sensitivity analysis replaced in-hospital mortality with all-cause mortality within 30 days of the index hospitalization using beneficiary death date from the Medicare enrollment files. Definition (a) attributed death to the index hospitalization when an additional hospitalization within 30 days occurred for COVID-19 or an advanced excluded MS-DRG (i.e., a new index hospitalization and not a readmission); definition (b) attributed death to the first index hospitalization and the additional index hospitalization when an additional hospitalization within 30 days occurred for COVID-19 or an advanced excluded MS-DRG (i.e., a new index hospitalization and not a readmission).

<sup>6</sup> Remaining racial and ethnic minority group members included Asian, North American Native, and beneficiaries of “unknown” or “other” race as reported by the Medicare beneficiary race variable from the Social Security Administration.

**eTable 5. Differential Changes in Hospitalization Outcomes<sup>1</sup>**

|                                      | Black vs. White   |                | Hispanic vs. White |                | Remaining Racial and Ethnic Minority Groups vs. White <sup>2</sup> |                |
|--------------------------------------|-------------------|----------------|--------------------|----------------|--------------------------------------------------------------------|----------------|
|                                      | Adjusted estimate | 95% CI         | Adjusted estimate  | 95% CI         | Adjusted estimate                                                  | 95% CI         |
| <b>COVID-19 Hospitalizations</b>     |                   |                |                    |                |                                                                    |                |
| In-hospital mortality <sup>3</sup>   | 0.11              | -0.24 to 0.47  | 3.49               | 2.90 to 4.08   | 3.50                                                               | 2.95 to 4.06   |
| Urban Hospitals                      | 0.08              | -1.05 to 1.20  | 3.11               | 0.93 to 5.29   | 4.47                                                               | 2.86 to 6.08   |
| Rural Hospitals                      | 0.12              | -0.26 to 0.49  | 3.48               | 2.88 to 4.09   | 3.42                                                               | 2.84 to 4.00   |
| Discharge to hospice                 | -1.20             | -1.40 to -1.00 | -0.60              | -0.91 to -0.29 | -1.03                                                              | -1.29 to -0.78 |
| Urban Hospitals                      | -0.90             | -1.44 to -0.36 | 0.60               | -0.46 to 1.66  | -0.56                                                              | -1.25 to 0.13  |
| Rural Hospitals                      | -1.22             | -1.43 to -1.00 | -0.63              | -0.95 to -0.30 | -1.05                                                              | -1.32 to -0.78 |
| Discharge to post-acute care         | 1.56              | 1.13 to 1.99   | -9.34              | -9.91 to -8.77 | -5.76                                                              | -6.25 to -5.26 |
| Urban Hospitals                      | 3.06              | 1.96 to 4.16   | -7.86              | -9.92 to -5.79 | -2.33                                                              | -4.02 to -0.64 |
| Rural Hospitals                      | 1.41              | 0.95 to 1.87   | -9.40              | -9.99 to -8.82 | -5.98                                                              | -6.50 to -5.47 |
|                                      |                   |                |                    |                |                                                                    |                |
| <b>Non-COVID-19 Hospitalizations</b> |                   |                |                    |                |                                                                    |                |
| In-hospital mortality                | 0.48              | 0.33 to 0.63   | 0.29               | -0.04 to 0.62  | 0.07                                                               | -0.17 to 0.30  |
| Urban Hospitals                      | 0.59              | 0.10 to 1.08   | 0.35               | -1.24 to 1.94  | -0.53                                                              | -1.35 to 0.29  |
| Rural Hospitals                      | 0.48              | 0.32 to 0.63   | 0.30               | -0.04 to 0.63  | 0.11                                                               | -0.13 to 0.36  |
| Discharge to hospice                 | 0.05              | -0.09 to 0.19  | 0.19               | -0.11 to 0.50  | 0.14                                                               | -0.07 to 0.36  |
| Urban Hospitals                      | 0.18              | -0.40 to 0.76  | -1.49              | -3.60 to 0.62  | 0.32                                                               | -0.45 to 1.09  |
| Rural Hospitals                      | 0.03              | -0.11 to 0.18  | 0.23               | -0.08 to 0.54  | 0.13                                                               | -0.10 to 0.35  |
| Discharge to post-acute care         | 0.29              | -0.07 to 0.66  | 0.32               | -0.41 to 1.05  | 0.47                                                               | -0.02 to 0.96  |
| Urban Hospitals                      | 0.67              | -0.65 to 1.98  | 1.94               | -2.53 to 6.41  | -0.01                                                              | -1.67 to 1.65  |
| Rural Hospitals                      | 0.29              | -0.09 to 0.67  | 0.32               | -0.43 to 1.06  | 0.52                                                               | 0.01 to 1.04   |

<sup>1</sup> Between-group differences were changes in outcomes during the COVID-19 pandemic (April 2020-February 2021) relative to pre-COVID-19 (January 2019-February 2020) in the racial/ethnic minority groups relative to those changes in the comparison (White) group, estimated using the main specification of the statistical model with a difference-in-differences approach adjusted for age, sex, disability, end-stage renal disease (ESRD), month fixed effects, and hospital fixed effects, with standard errors clustered at the hospital level.

<sup>2</sup> Remaining racial and ethnic minority group members included Asian, North American Native, and beneficiaries of “unknown” or “other” race as reported by the Medicare beneficiary race variable from the Social Security Administration.

<sup>3</sup> In-hospital mortality denotes a discharge status of death.

**eTable 6. Characteristics of Medicare Hospitalizations by Discharge Status**

*A. Hospitalizations with a discharge status of death (in-hospital death)*

|                                     | White     |              |        | Black     |              |        | Hispanic  |              |       | Remaining Racial and Ethnic Minority Groups <sup>1</sup> |              |       |
|-------------------------------------|-----------|--------------|--------|-----------|--------------|--------|-----------|--------------|-------|----------------------------------------------------------|--------------|-------|
|                                     | Pre-COVID | During COVID |        | Pre-COVID | During COVID |        | Pre-COVID | During COVID |       | Pre-COVID                                                | During COVID |       |
|                                     |           | Non-COVID    | COVID  |           | Non-COVID    | COVID  |           | Non-COVID    | COVID |                                                          | Non-COVID    | COVID |
| Hospitalizations (no.) <sup>2</sup> | 187,816   | 127,284      | 67,833 | 26,666    | 19,316       | 14,221 | 5,129     | 3,500        | 5,831 | 13,101                                                   | 8,851        | 7,911 |
| Share of total (%)                  | 2.8       | 3.3          | 16.6   | 2.7       | 3.6          | 17.0   | 2.8       | 3.6          | 21.7  | 3.3                                                      | 3.8          | 21.0  |
| Age (yrs)                           | 77.7      | 77.2         | 78.2   | 72.5      | 72.1         | 74.3   | 74.0      | 72.6         | 73.4  | 75.5                                                     | 74.9         | 75.9  |
| Sex (% Female)                      | 49.1      | 48.3         | 42.9   | 51.9      | 51.8         | 49.2   | 48.3      | 47.5         | 39.2  | 45.3                                                     | 44.3         | 41.0  |
| Risk score <sup>3</sup>             | 3.14      | 3.16         | 2.59   | 3.39      | 3.36         | 2.72   | 3.21      | 3.23         | 2.43  | 3.30                                                     | 3.32         | 2.51  |
| ESRD (%) <sup>4</sup>               | 4.9       | 5.0          | 3.5    | 19.3      | 20.0         | 13.3   | 18.9      | 20.3         | 13.7  | 12.9                                                     | 13.2         | 9.6   |
| Disability (%)                      | 8.6       | 8.7          | 5.8    | 19.1      | 19.0         | 14.2   | 19.9      | 22.5         | 15.8  | 10.7                                                     | 10.5         | 7.9   |
| Dual eligible (%)                   | 19.7      | 19.6         | 27.5   | 44.8      | 45.9         | 55.1   | 44.6      | 46.5         | 43.2  | 30.1                                                     | 30.5         | 36.3  |

*B. Hospitalizations with a discharge to hospice*

|                                     | White     |              |        | Black     |              |       | Hispanic  |              |       | Remaining Racial and Ethnic Minority Groups <sup>1</sup> |              |       |
|-------------------------------------|-----------|--------------|--------|-----------|--------------|-------|-----------|--------------|-------|----------------------------------------------------------|--------------|-------|
|                                     | Pre-COVID | During COVID |        | Pre-COVID | During COVID |       | Pre-COVID | During COVID |       | Pre-COVID                                                | During COVID |       |
|                                     |           | Non-COVID    | COVID  |           | Non-COVID    | COVID |           | Non-COVID    | COVID |                                                          | Non-COVID    | COVID |
| Hospitalizations (no.) <sup>2</sup> | 214,037   | 150,754      | 23,560 | 24,727    | 17,595       | 3,150 | 4,714     | 3,171        | 992   | 9,767                                                    | 7,492        | 1,247 |
| Share of total (%)                  | 3.2       | 3.9          | 5.8    | 2.5       | 3.2          | 3.8   | 2.5       | 3.2          | 3.7   | 2.5                                                      | 3.2          | 3.3   |
| Age (yrs)                           | 80.9      | 80.6         | 82.7   | 77.2      | 77.2         | 80.2  | 80.6      | 79.3         | 81.3  | 78.6                                                     | 78.3         | 81.0  |
| Sex (% Female)                      | 55.2      | 54.5         | 54.1   | 57.6      | 58.6         | 57.3  | 56.3      | 54.9         | 52.7  | 50.9                                                     | 51.5         | 49.6  |
| Risk score <sup>3</sup>             | 3.17      | 3.23         | 2.60   | 3.45      | 3.48         | 2.84  | 3.22      | 3.28         | 2.65  | 3.35                                                     | 3.42         | 2.66  |
| ESRD (%) <sup>4</sup>               | 2.2       | 2.2          | 1.8    | 7.2       | 7.2          | 6.6   | 5.7       | 7.4          | 5.3   | 4.8                                                      | 5.2          | 5.4   |
| Disability (%)                      | 5.2       | 5.0          | 3.1    | 11.1      | 10.4         | 5.8   | 10.0      | 11.7         | 7.1   | 6.8                                                      | 6.1          | 3.7   |
| Dual eligible (%)                   | 20.0      | 18.5         | 30.9   | 46.6      | 46.4         | 65.2  | 64.4      | 62.8         | 67.9  | 38.7                                                     | 37.0         | 49.1  |

C. Hospitalizations with a discharge to post-acute care

|                                     | White     |              |        | Black     |              |        | Hispanic  |              |       | Remaining Racial and Ethnic Minority Groups <sup>1</sup> |              |       |
|-------------------------------------|-----------|--------------|--------|-----------|--------------|--------|-----------|--------------|-------|----------------------------------------------------------|--------------|-------|
|                                     | Pre-COVID | During COVID |        | Pre-COVID | During COVID |        | Pre-COVID | During COVID |       | Pre-COVID                                                | During COVID |       |
|                                     |           | Non-COVID    | COVID  |           | Non-COVID    | COVID  |           | Non-COVID    | COVID |                                                          | Non-COVID    | COVID |
| Hospitalizations (no.) <sup>2</sup> | 1,618,444 | 788,965      | 93,582 | 212,702   | 102,721      | 20,281 | 33,259    | 14,163       | 3,884 | 76,761                                                   | 36,084       | 6,318 |
| Share of total (%)                  | 24.1      | 20.5         | 22.9   | 21.9      | 18.9         | 24.2   | 18.0      | 14.5         | 14.5  | 19.4                                                     | 15.5         | 16.7  |
| Age (yrs)                           | 78.6      | 78.2         | 78.6   | 73.0      | 72.3         | 73.6   | 74.1      | 72.3         | 74.2  | 76.0                                                     | 74.9         | 76.1  |
| Sex (% Female)                      | 60.0      | 59.2         | 55.6   | 56.2      | 53.2         | 51.9   | 53.3      | 49.6         | 48.5  | 52.5                                                     | 50.2         | 48.8  |
| Risk score <sup>3</sup>             | 2.11      | 2.16         | 2.21   | 2.32      | 2.42         | 2.34   | 2.22      | 2.33         | 2.22  | 2.15                                                     | 2.23         | 2.21  |
| ESRD (%) <sup>4</sup>               | 3.2       | 3.2          | 3.7    | 14.0      | 14.3         | 14.5   | 13.3      | 14.3         | 14.4  | 8.5                                                      | 8.9          | 9.4   |
| Disability (%)                      | 7.2       | 7.4          | 7.7    | 17.4      | 18.4         | 15.2   | 20.0      | 22.8         | 17.4  | 8.9                                                      | 9.8          | 9.2   |
| Dual eligible (%)                   | 26.1      | 26.7         | 42.4   | 56.1      | 58.9         | 70.6   | 78.5      | 78.3         | 84.0  | 51.0                                                     | 48.7         | 65.2  |

<sup>1</sup> Remaining racial and ethnic minority group members included Asian, North American Native, and beneficiaries of “unknown” or “other” race as reported by the Medicare beneficiary race variable from the Social Security Administration.

<sup>2</sup> Total number of hospitalizations in Medicare fee-for-service.

<sup>3</sup> The risk score was calculated using the Centers for Medicare and Medicaid Services Hierarchical Condition Category (CMS-HCC) model with the beneficiaries’ age, sex, and inpatient clinical diagnoses.

<sup>4</sup> ESRD denotes end stage renal disease.

**eTable 7. Absent Non-COVID-19 Inpatients During the Pandemic**

|                         | White     |              |                     | Black     |              |                     | Hispanic  |              |                     | Remaining Racial and Ethnic Minority Groups <sup>1</sup> |              |                     |
|-------------------------|-----------|--------------|---------------------|-----------|--------------|---------------------|-----------|--------------|---------------------|----------------------------------------------------------|--------------|---------------------|
|                         | Pre-COVID | During COVID | Absent During COVID | Pre-COVID | During COVID | Absent During COVID | Pre-COVID | During COVID | Absent During COVID | Pre-COVID                                                | During COVID | Absent During COVID |
| Non-COVID-19 Patients   |           |              |                     |           |              |                     |           |              |                     |                                                          |              |                     |
| Hospitalizations        | 141,674   | 103,142      | 38,532              | 89,950    | 65,109       | 24,841              | 16,888    | 11,584       | 5,304               | 589,920                                                  | 432,755      | 157,165             |
| Age (yrs)               | 65.9      | 65.2         | 67.6                | 65.1      | 64.6         | 66.2                | 63.6      | 62.2         | 66.7                | 72.8                                                     | 72.6         | 73.5                |
| Sex (% female)          | 52.6      | 51.2         | 56.5                | 54.9      | 53.5         | 58.8                | 51.3      | 49.5         | 55.3                | 53.6                                                     | 52.8         | 55.8                |
| Risk score <sup>2</sup> | 2.03      | 2.10         | 1.85                | 2.08      | 2.16         | 1.89                | 1.95      | 2.03         | 1.79                | 1.94                                                     | 2.00         | 1.79                |
| ESRD (%) <sup>3</sup>   | 18.0      | 18.9         | 15.5                | 19.5      | 20.6         | 16.6                | 21.2      | 22.7         | 17.9                | 4.3                                                      | 4.4          | 4.0                 |
| Disability (%)          | 27.7      | 27.8         | 27.4                | 31.0      | 30.8         | 31.7                | 33.7      | 35.8         | 29.0                | 13.1                                                     | 13.0         | 13.5                |
| Dual eligible (%)       | 53.2      | 52.6         | 54.5                | 53.1      | 53.5         | 51.9                | 72.5      | 71.3         | 75.0                | 22.3                                                     | 21.8         | 23.6                |

<sup>1</sup> Remaining racial and ethnic minority group members included Asian, North American Native, and beneficiaries of “unknown” or “other” race as reported by the Medicare beneficiary race variable from the Social Security Administration.

<sup>2</sup> The risk score was calculated using the Centers for Medicare and Medicaid Services Hierarchical Condition Category (CMS-HCC) model with the beneficiaries’ age, sex, and inpatient clinical diagnoses.

<sup>3</sup> ESRD denotes end stage renal disease.

**eTable 8. Differential Changes in Risk Score<sup>1</sup>**

$$risk_{iht} = \beta_0 + \sum_{t=1/19}^{t=3/20} \beta_t (R_i \times 1(month_t)) + \beta_{post} (R_i \times post_t) + \Gamma X_i + \theta_h + \delta_t + \varepsilon_{iht}$$

| Non-COVID-19 Hospitalizations          | Black vs. White |                | Hispanic vs. White |                | Remaining Racial and Ethnic Minority Groups vs. White <sup>2</sup> |                |
|----------------------------------------|-----------------|----------------|--------------------|----------------|--------------------------------------------------------------------|----------------|
|                                        | Coeff (S.E.)    | 95% CI         | Coeff (S.E.)       | 95% CI         | Coeff (S.E.)                                                       | 95% CI         |
| Differential Change ( $\beta_{post}$ ) | 0.024 (0.005)   | 0.015 to 0.034 | 0.015 (0.011)      | 0.015 to 0.034 | 0.021 (0.008)                                                      | 0.006 to 0.036 |

<sup>1</sup> The Centers for Medicare and Medicaid Services Hierarchical Condition Category (CMS-HCC) risk score is a measure of expected spending typically reflecting the clinical burden of disease used by Medicare in risk adjustment and was calculated using the model beneficiaries' age, sex, and inpatient clinical diagnoses. This analysis examined changes in the risk score associated with racial and ethnic groups among non-COVID-19 hospitalizations.

<sup>2</sup> Remaining racial and ethnic minority group members included Asian, North American Native, and beneficiaries of "unknown" or "other" race as reported by the Medicare beneficiary race variable from the Social Security Administration.

**eTable 9. Sensitivity Analyses and Falsification Test, Black vs. White**

|                                              | Black vs. White<br>Between-group Differences <sup>1</sup> |         |                               |         |                               |         |                               |         |                               |         |                                 |         |                             |         |
|----------------------------------------------|-----------------------------------------------------------|---------|-------------------------------|---------|-------------------------------|---------|-------------------------------|---------|-------------------------------|---------|---------------------------------|---------|-----------------------------|---------|
|                                              | Main Specification                                        |         | Alternative Specification (1) |         | Alternative Specification (2) |         | Alternative Specification (3) |         | Alternative Specification (4) |         | Alternative Sample Age 65+ only |         | Falsification Specification |         |
|                                              | Coefficient                                               | P value | Coefficient                   | P value | Coefficient                   | P value | Coefficient                   | P value | Coefficient                   | P value | Coefficient                     | P value | Coefficient                 | P value |
| <b>COVID-19 Hospitalizations<sup>2</sup></b> |                                                           |         |                               |         |                               |         |                               |         |                               |         |                                 |         |                             |         |
| In-hospital mortality <sup>3</sup>           | 0.11                                                      | 0.53    | 0.24                          | 0.19    | 0.75                          | < 0.001 | 0.09                          | 0.63    | 0.21                          | 0.23    | 0.33                            | 0.12    | --                          | --      |
| Discharge to hospice                         | -1.20                                                     | < 0.001 | -1.24                         | < 0.001 | -1.05                         | < 0.001 | -1.20                         | < 0.001 | -1.10                         | < 0.001 | -1.18                           | < 0.001 | --                          | --      |
| Discharge to post-acute care                 | 1.56                                                      | < 0.001 | 1.87                          | < 0.001 | 1.22                          | < 0.001 | 1.57                          | < 0.001 | 1.43                          | < 0.001 | 2.62                            | < 0.001 | --                          | --      |
| <b>Non-COVID-19 Hospitalizations</b>         |                                                           |         |                               |         |                               |         |                               |         |                               |         |                                 |         |                             |         |
| In-hospital mortality                        | 0.48                                                      | < 0.001 | 0.48                          | < 0.001 | 0.46                          | < 0.001 | 0.48                          | < 0.001 | 0.48                          | < 0.001 | 0.59                            | < 0.001 | -0.19                       | 0.05    |
| Discharge to hospice                         | 0.05                                                      | 0.50    | 0.05                          | 0.51    | 0.08                          | 0.27    | 0.05                          | 0.50    | 0.05                          | 0.45    | 0.24                            | 0.02    | -0.03                       | 0.77    |
| Discharge to post-acute care                 | 0.29                                                      | 0.11    | 0.29                          | 0.12    | 0.24                          | 0.19    | 0.29                          | 0.11    | 0.30                          | 0.11    | -0.57                           | 0.02    | 0.38                        | 0.10    |
| <b>All Hospitalizations</b>                  |                                                           |         |                               |         |                               |         |                               |         |                               |         |                                 |         |                             |         |
| In-hospital mortality                        | 0.95                                                      | < 0.001 | 0.94                          | < 0.001 | 0.94                          | < 0.001 | 0.94                          | < 0.001 | 0.95                          | < 0.001 | 1.40                            | < 0.001 | -0.18                       | 0.06    |
| <i>Controls</i>                              |                                                           |         |                               |         |                               |         |                               |         |                               |         |                                 |         |                             |         |
| Age, sex                                     | Yes                                                       |         | Yes                           |         | Yes                           |         | Yes                           |         | Yes                           |         | Yes                             |         | Yes                         |         |
| Share ESRD <sup>4</sup> , disability         | Yes                                                       |         | No                            |         | Yes                           |         | Yes                           |         | Yes                           |         | Yes                             |         | Yes                         |         |
| CBSA-level COVID-19 infection rate           | No                                                        |         | No                            |         | No                            |         | Yes                           |         | No                            |         | No                              |         | No                          |         |
| Hospital fixed effects                       | Yes                                                       |         | Yes                           |         | No                            |         | Yes                           |         | No                            |         | Yes                             |         | Yes                         |         |
| Hospital random effects                      | No                                                        |         | No                            |         | No                            |         | No                            |         | Yes                           |         | No                              |         | No                          |         |

<sup>1</sup> Between-group differences were changes in outcomes during the COVID-19 pandemic (April 2020-February 2021) relative to pre-COVID-19 (January 2019-February 2020) in Black patients relative to those changes in the comparison (White) group, estimated using our statistical models shown here, with standard errors clustered at the hospital level. The alternative specifications (1) through (4) differ in their inclusion of controls, as shown in the bottom portion of the table. The alternative sample examined only aged beneficiaries who were 65 years or older. The falsification test estimated the main specification of the statistical model, using January-December 2019 as pre-COVID months and January-February 2020 as the COVID period.

<sup>2</sup> Given there were no COVID-19 hospitalizations pre-COVID, the between-group difference was a cross-sectional comparison between Black beneficiaries and White beneficiaries using data during the pandemic.

<sup>3</sup> In-hospital mortality denotes a discharge status of death.

<sup>4</sup> The risk score was calculated using the Centers for Medicare and Medicaid Services Hierarchical Condition Category (CMS-HCC) model with the beneficiaries' age, sex, and inpatient clinical diagnoses.

<sup>5</sup> ESRD denotes end stage renal disease.



**eTable 10. Sensitivity Analyses and Falsification Test, Hispanic vs. White**

|                                              | Hispanic vs. White<br>Between-group Differences <sup>1</sup> |         |                               |         |                               |         |                               |         |                               |         |                                 |         |                             |         |
|----------------------------------------------|--------------------------------------------------------------|---------|-------------------------------|---------|-------------------------------|---------|-------------------------------|---------|-------------------------------|---------|---------------------------------|---------|-----------------------------|---------|
|                                              | Main Specification                                           |         | Alternative Specification (1) |         | Alternative Specification (2) |         | Alternative Specification (3) |         | Alternative Specification (4) |         | Alternative Sample Age 65+ only |         | Falsification Specification |         |
|                                              | Coefficient                                                  | P value | Coefficient                   | P value | Coefficient                   | P value | Coefficient                   | P value | Coefficient                   | P value | Coefficient                     | P value | Coefficient                 | P value |
| <b>COVID-19 Hospitalizations<sup>2</sup></b> |                                                              |         |                               |         |                               |         |                               |         |                               |         |                                 |         |                             |         |
| In-hospital mortality <sup>3</sup>           | 3.49                                                         | < 0.001 | 3.61                          | < 0.001 | 6.08                          | < 0.001 | 3.47                          | < 0.001 | 4.31                          | < 0.001 | 4.20                            | < 0.001 | --                          | --      |
| Discharge to hospice                         | -0.60                                                        | < 0.001 | -0.68                         | < 0.001 | -0.96                         | < 0.001 | -0.60                         | < 0.001 | -0.88                         | < 0.001 | -0.58                           | 0.003   | --                          | --      |
| Discharge to post-acute care                 | -9.34                                                        | < 0.001 | -9.05                         | < 0.001 | -8.06                         | < 0.001 | -9.34                         | < 0.001 | -8.99                         | < 0.001 | -9.18                           | < 0.001 | --                          | --      |
| <b>Non-COVID-19 Hospitalizations</b>         |                                                              |         |                               |         |                               |         |                               |         |                               |         |                                 |         |                             |         |
| In-hospital mortality                        | 0.29                                                         | 0.08    | 0.29                          | 0.08    | 0.27                          | 0.11    | 0.27                          | 0.11    | 0.28                          | 0.09    | 0.28                            | 0.23    | 0.28                        | 0.19    |
| Discharge to hospice                         | 0.19                                                         | 0.21    | 0.19                          | 0.22    | 0.22                          | 0.16    | 0.19                          | 0.23    | 0.20                          | 0.21    | 0.54                            | 0.03    | -0.17                       | 0.43    |
| Discharge to post-acute care                 | 0.32                                                         | 0.39    | 0.33                          | 0.38    | 0.01                          | 0.97    | 0.34                          | 0.37    | 0.32                          | 0.40    | -0.24                           | 0.65    | 0.67                        | 0.17    |
| <b>All Hospitalizations</b>                  |                                                              |         |                               |         |                               |         |                               |         |                               |         |                                 |         |                             |         |
| In-hospital mortality                        | 2.86                                                         | < 0.001 | 2.86                          | < 0.001 | 2.83                          | < 0.001 | 2.62                          | < 0.001 | 2.85                          | < 0.001 | 3.99                            | < 0.001 | 0.28                        | 0.19    |
| <i>Controls</i>                              |                                                              |         |                               |         |                               |         |                               |         |                               |         |                                 |         |                             |         |
| Age, sex                                     | Yes                                                          |         | Yes                           |         | Yes                           |         | Yes                           |         | Yes                           |         | Yes                             |         | Yes                         |         |
| Share ESRD <sup>4</sup> , disability         | Yes                                                          |         | No                            |         | Yes                           |         | Yes                           |         | Yes                           |         | Yes                             |         | Yes                         |         |
| CBSA-level COVID-19 infection rate           | No                                                           |         | No                            |         | No                            |         | Yes                           |         | No                            |         | No                              |         | No                          |         |
| Hospital fixed effects                       | Yes                                                          |         | Yes                           |         | No                            |         | Yes                           |         | No                            |         | Yes                             |         | Yes                         |         |
| Hospital random effects                      | No                                                           |         | No                            |         | No                            |         | No                            |         | Yes                           |         | No                              |         | No                          |         |

<sup>1</sup> Between-group differences were changes in outcomes during the COVID-19 pandemic (April 2020-February 2021) relative to pre-COVID-19 (January 2019-February 2020) in Hispanic patients relative to those changes in the comparison (White) group, estimated using our statistical models shown here, with standard errors clustered at the hospital level. The alternative specifications (1) through (4) differ in their inclusion of controls, as shown in the bottom portion of the table. The alternative sample examined only aged beneficiaries who were 65 years or older. The falsification test estimated the main specification of the statistical model, using January-December 2019 as pre-COVID months and January-February 2020 as the COVID period.

<sup>2</sup> Given there were no COVID-19 hospitalizations pre-COVID, the between-group difference was a cross-sectional comparison between Hispanic beneficiaries and White beneficiaries using data during the pandemic.

<sup>3</sup> In-hospital mortality denotes a discharge status of death.

<sup>4</sup> The risk score was calculated using the Centers for Medicare and Medicaid Services Hierarchical Condition Category (CMS-HCC) model with the beneficiaries' age, sex, and inpatient clinical diagnoses.

<sup>5</sup> ESRD denotes end stage renal disease.

**eTable 11. Sensitivity Analyses and Falsification Test, Remaining Racial and Ethnic Minority Groups vs. White**

|                                              | Remaining Racial and Ethnic Minority Groups vs. White <sup>1</sup><br>Between-group Differences <sup>2</sup> |         |                               |         |                               |         |                               |         |                               |         |                                 |         |                             |         |
|----------------------------------------------|--------------------------------------------------------------------------------------------------------------|---------|-------------------------------|---------|-------------------------------|---------|-------------------------------|---------|-------------------------------|---------|---------------------------------|---------|-----------------------------|---------|
|                                              | Main Specification                                                                                           |         | Alternative Specification (1) |         | Alternative Specification (2) |         | Alternative Specification (3) |         | Alternative Specification (4) |         | Alternative Sample Age 65+ only |         | Falsification Specification |         |
|                                              | Coefficient                                                                                                  | P value | Coefficient                   | P value | Coefficient                   | P value | Coefficient                   | P value | Coefficient                   | P value | Coefficient                     | P value | Coefficient                 | P value |
| <b>COVID-19 Hospitalizations<sup>3</sup></b> |                                                                                                              |         |                               |         |                               |         |                               |         |                               |         |                                 |         |                             |         |
| In-hospital mortality <sup>4</sup>           | 3.49                                                                                                         | < 0.001 | 3.61                          | < 0.001 | 6.08                          | < 0.001 | 3.47                          | < 0.001 | 4.31                          | < 0.001 | 4.20                            | < 0.001 | --                          | --      |
| Discharge to hospice                         | -0.60                                                                                                        | < 0.001 | -0.68                         | < 0.001 | -0.96                         | < 0.001 | -0.60                         | < 0.001 | -0.88                         | < 0.001 | -0.58                           | 0.003   | --                          | --      |
| Discharge to post-acute care                 | -9.34                                                                                                        | < 0.001 | -9.05                         | < 0.001 | -8.06                         | < 0.001 | -9.34                         | < 0.001 | -8.99                         | < 0.001 | -9.18                           | < 0.001 | --                          | --      |
| <b>Non-COVID-19 Hospitalizations</b>         |                                                                                                              |         |                               |         |                               |         |                               |         |                               |         |                                 |         |                             |         |
| In-hospital mortality                        | 0.29                                                                                                         | 0.08    | 0.29                          | 0.08    | 0.27                          | 0.11    | 0.27                          | 0.11    | 0.28                          | 0.09    | 0.28                            | 0.23    | 0.28                        | 0.19    |
| Discharge to hospice                         | 0.19                                                                                                         | 0.21    | 0.19                          | 0.22    | 0.22                          | 0.16    | 0.19                          | 0.23    | 0.20                          | 0.21    | 0.54                            | 0.03    | -0.17                       | 0.43    |
| Discharge to post-acute care                 | 0.32                                                                                                         | 0.39    | 0.33                          | 0.38    | 0.01                          | 0.97    | 0.34                          | 0.37    | 0.32                          | 0.40    | -0.24                           | 0.65    | 0.67                        | 0.17    |
| <b>All Hospitalizations</b>                  |                                                                                                              |         |                               |         |                               |         |                               |         |                               |         |                                 |         |                             |         |
| In-hospital mortality                        | 2.86                                                                                                         | < 0.001 | 2.86                          | < 0.001 | 2.83                          | < 0.001 | 2.62                          | < 0.001 | 2.85                          | < 0.001 | 3.99                            | < 0.001 | 0.28                        | 0.19    |
| <i>Controls</i>                              |                                                                                                              |         |                               |         |                               |         |                               |         |                               |         |                                 |         |                             |         |
| Age, sex                                     | Yes                                                                                                          |         | Yes                           |         | Yes                           |         | Yes                           |         | Yes                           |         | Yes                             |         | Yes                         |         |
| Share ESRD <sup>4</sup> , disability         | Yes                                                                                                          |         | No                            |         | Yes                           |         | Yes                           |         | Yes                           |         | Yes                             |         | Yes                         |         |
| CBSA-level COVID-19 infection rate           | No                                                                                                           |         | No                            |         | No                            |         | Yes                           |         | No                            |         | No                              |         | No                          |         |
| Hospital fixed effects                       | Yes                                                                                                          |         | Yes                           |         | No                            |         | Yes                           |         | No                            |         | Yes                             |         | Yes                         |         |
| Hospital random effects                      | No                                                                                                           |         | No                            |         | No                            |         | No                            |         | Yes                           |         | No                              |         | No                          |         |

<sup>1</sup> Remaining racial and ethnic minority group members included Asian, North American Native, and beneficiaries of “unknown” or “other” race as reported by the Medicare beneficiary race variable from the Social Security Administration.

<sup>2</sup> Between-group differences were changes in outcomes during the COVID-19 pandemic (April 2020-February 2021) relative to pre-COVID-19 (January 2019-February 2020) in the racial and ethnic minority groups relative to those changes in the comparison (White) group, estimated using our statistical models shown here, with standard errors clustered at the hospital level. The alternative specifications (1) through (4) differ in their inclusion of controls, as shown in the bottom portion of the table. The alternative sample examined only aged beneficiaries who were 65 years or older. The falsification test estimated the main specification of the statistical model, using January-December 2019 as pre-COVID months and January-February 2020 as the COVID period.

<sup>3</sup> Given there were no COVID-19 hospitalizations pre-COVID, the between-group difference was a cross-sectional comparison between beneficiaries of the racial and ethnic minority groups and White beneficiaries using data during the pandemic.

<sup>3</sup> In-hospital mortality denotes a discharge status of death.

<sup>4</sup> The risk score was calculated using the Centers for Medicare and Medicaid Services Hierarchical Condition Category (CMS-HCC) model with the beneficiaries’ age, sex, and inpatient clinical diagnoses.

<sup>5</sup> ESRD denotes end stage renal disease.
